# Supplementary material for: Environmental lifecycle assessment of CO2-filled triboelectric nanogenerators to help achieve carbon neutrality
Source: Royal Society of Chemistry journal article supplement (doi:10.1039/d2ee04119g), 2023-01-01
Supplement: d2ee04119g1.pdf [file d2ee04119g1.pdf]

## Environmental life cycle assessment of CO<sub>2</sub>-filled triboelectric nanogenerator toward Carbon Neutrality

Guoqiang Xu<sup>a,‡</sup>, Xinyuan Li<sup>b,‡</sup>, Jingjing Fu<sup>a</sup>, Yuekuan Zhou<sup>c,d,e</sup>, Xin Xia<sup>a,c,\*</sup>, Yunlong Zi<sup>a,c,d,e,f,\*</sup>

<sup>a</sup> Department of Mechanical and Automation Engineering, The Chinese University of Hong Kong, Shatin, N.T., Hong Kong SAR, China

<sup>b</sup> Beijing Institute of Nanoenergy and Nanosystems, Chinese Academy of Sciences, Beijing 100083, China

<sup>c</sup> Thrust of Sustainable Energy and Environment, The Hong Kong University of Science and Technology (Guangzhou), Nansha, Guangzhou, Guangdong 511400, China

<sup>d</sup> HKUST Shenzhen-Hong Kong Collaborative Innovation Research Institute, Futian, Shenzhen, Guangdong 518048, China

<sup>e</sup> Department of Mechanical and Aerospace Engineering, The Hong Kong University of Science and Technology, Clear Water Bay, Hong Kong SAR, China

<sup>f</sup> HKUST Fok Ying Tung Research Institute, Guangzhou, Guangdong 511400, China

‡G. Xu and X. Li contributed equally to the work

### Supporting information Note 1

Figure S1 shows the breakdown strength of CO<sub>2</sub> at different gap distance based on the Paschen's law.<sup>9</sup> It can be observed that the breakdown strength of CO<sub>2</sub> at 10 atm is higher than the breakdown strength of CO<sub>2</sub> at 1 atm, indicating the breakdown is more difficult to take place. So, in the manuscript, our idea is to suppress breakdown effect by increasing gas pressure of TENG based on the above mentioned principles, thereby increasing the electric output to offset more carbon emissions.

It is not the voltage but the electric field strength that causes air breakdown, and the breakdown strength of air is approximately  $3 \times 10^6$  V/m under atmospheric pressure.<sup>1</sup> Figure R4 shows the potential and electric field distribution of TENG under open-circuit with the surface charge density of 10 nC/cm<sup>2</sup>. It can be seen that the voltage of TENG can reach thousand volts (Figure S2A-S2C). During the moving process, TENG is easily to form a very high local electric field of 10<sup>7</sup> V/m level. (Figure SDd-2F), which far exceeded the breakdown strength of air. Therefore, TENG can easily induce air breakdown under atmospheric pressure. More discussion about breakdown of TENG also can be obtained from those papers.<sup>2-4</sup>

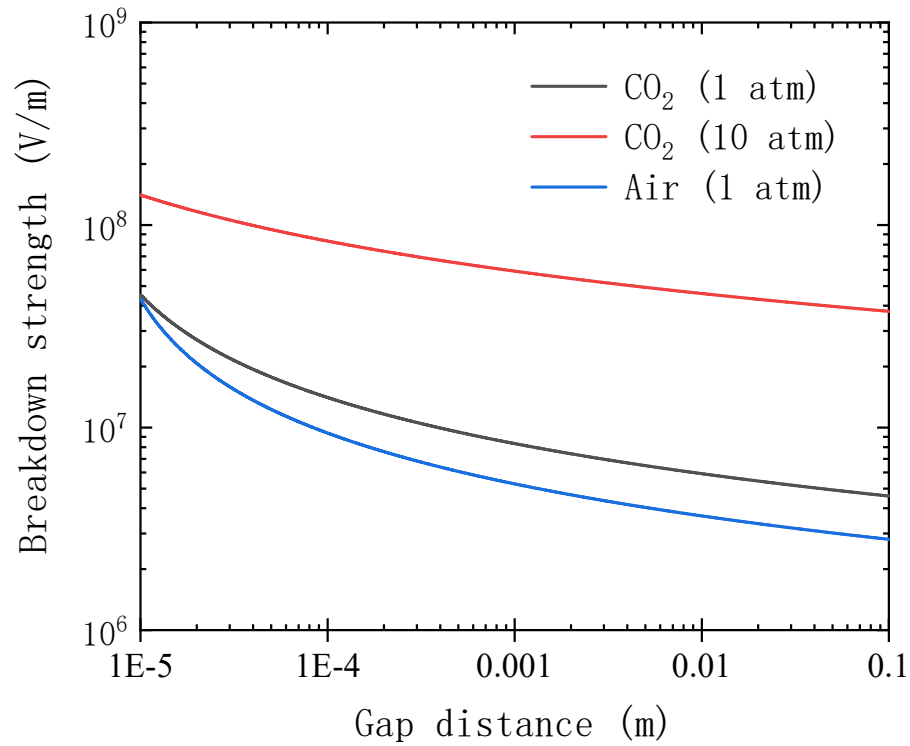

Figure S1. Paschen curves obtained from air and  $\text{CO}_2$  under different gap distance.

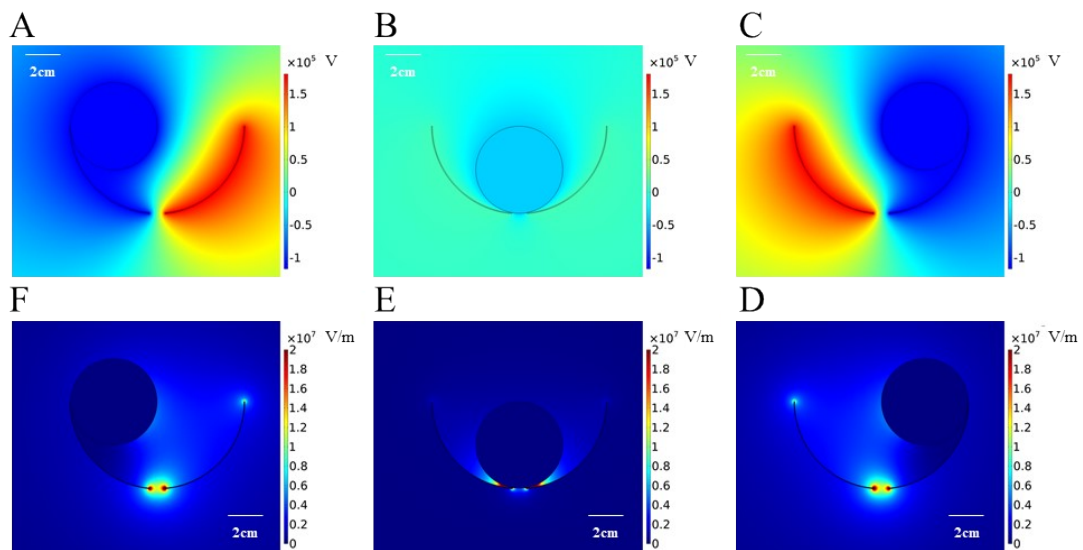

Figure S2. Potential and electric field distribution of TENG. (A-C) Potential difference of TENG when the inside ball is on the left, middle and right positions. (D-F) electric field distribution of TENG when the inside ball is on the left, middle and right positions.

## Supporting information Note 2

Here, we summarize the output performance of some related works for harvesting ocean energy based on spherical TENG in Table R1.<sup>5-11</sup> There is still a certain difference between its output performance and our theoretical calculation results, but it also proves that TENG still has huge room for improvement in terms of output.

| Demo                                                                                | Voltage (V) | Current ( $\mu\text{A}$ ) | Charge (nC) | Radius (cm) | Equivalent Average Power Density ( $\text{W m}^{-3}$ ) | Reference |
|-------------------------------------------------------------------------------------|-------------|---------------------------|-------------|-------------|--------------------------------------------------------|-----------|
|    | 350V        | 5                         | 500         | 3.5         | 4.2                                                    | [5]       |
|    | 281         | 76                        | 270         | 6           | 0.085                                                  | [6]       |
|  | 32.2        | 8.2                       | -           | 4           | 0.065                                                  | [7]       |
|  | 7.6         | 0.74                      | 27          | 65          | 0.012                                                  | [8]       |
|  | 280         | 120                       | 1000        | 7.5         | 2.4                                                    | [9]       |
|  | 3000        | 5                         | 550         | 3.3         | 8.69                                                   | [10]      |

|                                                                                                        |      |     |     |                          |                   |                    |
|--------------------------------------------------------------------------------------------------------|------|-----|-----|--------------------------|-------------------|--------------------|
| 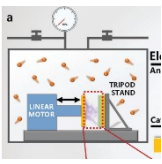 <p><b>1 Atm</b></p>  | 1000 | 4.6 | 100 | Square type(2 cm × 2 cm) | 39(theoretical)   | [11] and this work |
|  <p><b>10 Atm</b></p> | 8000 | 8   | 175 | Square type(2 cm × 2 cm) | 1021(theoretical) | [11] and this work |

### Supporting Information Note 3

#### Methods Section

1, effective maximized energy output  $E_{em}$

In Figure 3S, we take SFT mode TENG as an example. Firstly, the red line represents the cycles for maximized energy(CMEO), which is the maximum energy TENG can theoretically output in each working cycle. However, due to the breakdown effect, voltage of TENG cannot go to very high without limitation. When the voltage of TENG is higher than the breakdown line, breakdown occurs, and some charge is released (yellow region). So the effective maximized effective energy output per cycle  $E_{em}$  can be defined as the area of CMEO subtracting the breakdown area in each figure. Then the volumetric energy density equals to the maximized energy divided by volume of TENG.

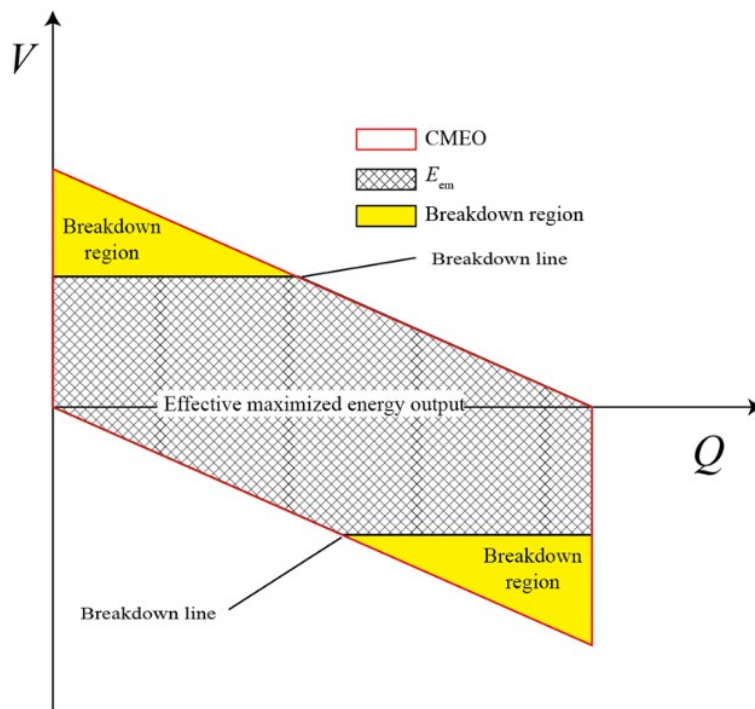

Figure S3.  $E_{em}$  and CEMO demonstrating in Q-V plots of SFT mode TENG

## 2, LCA analysis

In LCA, the environmental impacts of product are qualified through inventory of the energy and materials that required across the industry value chain , which is listed in Table 1. It is performed following the guidelines of the International Organization for Standardization (ISO) 14040 and 14044 through GaBi Education software.

## 3, TENG Fabrication

Since the commercialization and industrialization of TENG is still at the beginning stage, so a roll-to-roll process is proposed to fabricate TENG. The process main consists of 4 steps: clean the acrylic sphere, paste copper tapes on the inside surface of sphere, solder the leads to two electrodes and put the PTFE ball into the sphere, and then package the whole structure and connect all the wires together at output terminal.

## References for supporting information only:

1. <https://hypertextbook.com/facts/2000/AliceHong.shtml>
2. Niu SM, Wang ZL. Theoretical systems of triboelectric nanogenerators. *Nano Energy*. May 2015;14:161-192. doi:10.1016/j.nanoen.2014.11.034
3. Wu H, Wang S, Wang Z, Zi Y. Achieving ultrahigh instantaneous power density of 10 MW/m<sup>2</sup> by leveraging the opposite-charge-enhanced transistor-like triboelectric nanogenerator (OCT-TENG). *Nature Communications*. 2021/09/15 2021;12(1):5470. doi:10.1038/s41467-021-25753-7
4. Zi Y, Wu C, Ding W, Wang ZL. Maximized Effective Energy Output of Contact-Separation-Triggered Triboelectric Nanogenerators as Limited by Air Breakdown. *Adv Funct Mater*. 2017;27(24):1700049. doi:<https://10.1002/adfm.201700049>
5. Cheng P, Guo H, Wen Z, et al. Largely enhanced triboelectric nanogenerator for efficient harvesting of water wave energy by soft contacted structure. *Nano Energy*. 2019;57:432-439.
6. Liu G, Guo H, Xu S, Hu C, Wang ZL. Oblate Spheroidal Triboelectric Nanogenerator for All-Weather Blue Energy Harvesting. *Adv Energy Mater*. 2019;9(26):1900801. doi:<https://doi.org/10.1002/aenm.201900801>
7. Chen H, Wang J, Ning A. Optimization of a Rolling Triboelectric Nanogenerator Based on the Nano-Micro Structure for Ocean Environmental Monitoring. *ACS Omega*. 2021/08/17 2021;6(32):21059-21065. doi:10.1021/acsomega.1c02709
8. Lin Z, Zhang B, Xie Y, Wu Z, Yang J, Wang ZL. Elastic-connection and soft-contact triboelectric nanogenerator with superior durability and efficiency. *Adv Funct Mater*. 2021;31(40):2105237.
9. Liang X, Jiang T, Liu G, Feng Y, Zhang C, Wang ZL. Spherical triboelectric nanogenerator integrated with power management module for harvesting multidirectional water wave energy. 10.1039/C9EE03258D. *Energ Environ Sci*. 2020;13(1):277-285. doi:10.1039/C9EE03258D
10. Yang X, Xu L, Lin P, et al. Macroscopic self-assembly network of encapsulated high-performance triboelectric nanogenerators for water wave energy harvesting. *Nano Energy*. 2019/06/01/ 2019;60:404-412. doi:<https://doi.org/10.1016/j.nanoen.2019.03.054>
11. Fu J, Xu G, Li C, et al. Achieving ultrahigh output energy density of triboelectric nanogenerators in high-pressure gas environment. *Adv Sci*. 2020;7(24):2001757.
